# Supplementary material for: Nrf2 suppresses macrophage inflammatory response by blocking proinflammatory cytokine transcription
Source: PubMed Central journal article supplement (PMC4879264; doi:10.1038/ncomms11624), 2016-05-23
Supplement: ncomms11624-s1.pdf [file ncomms11624-s1.pdf]

## Supplementary Fig. 1

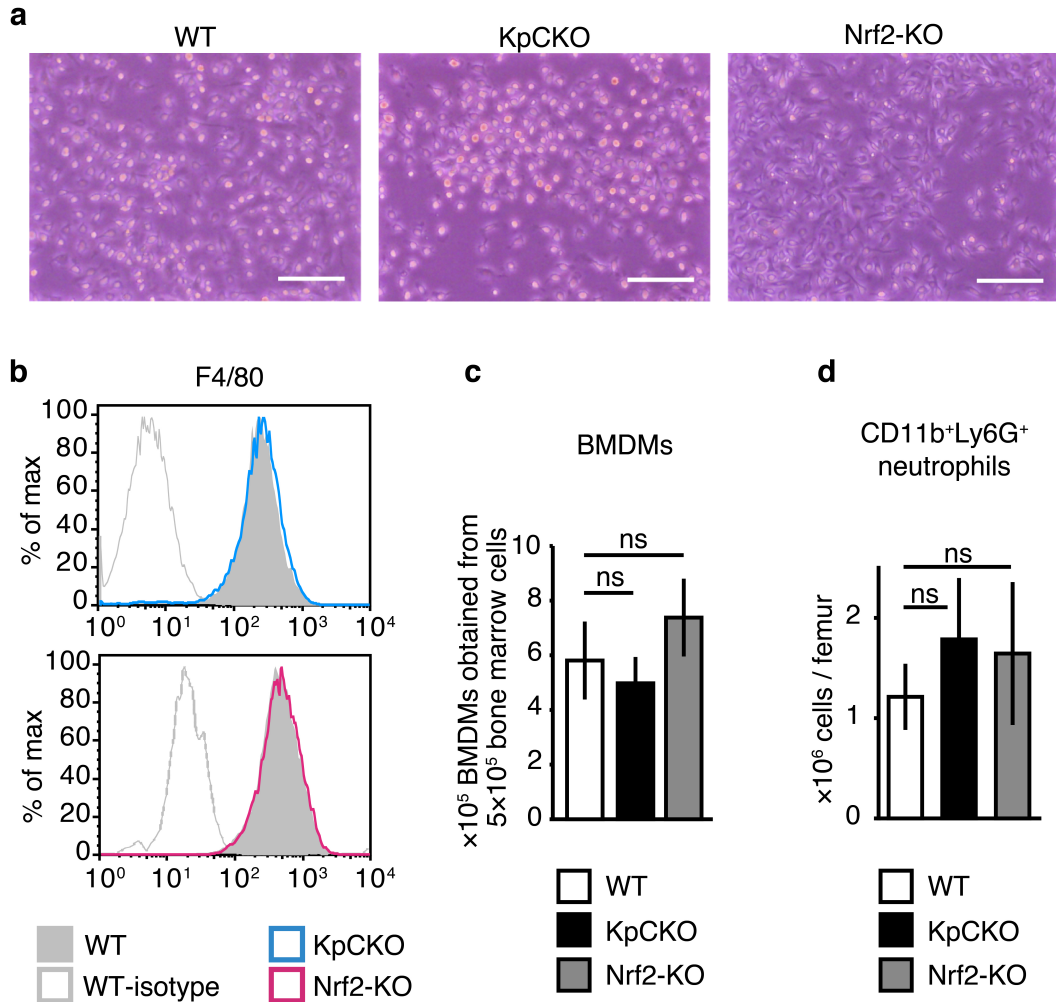

**Supplementary Fig. 1** *Nrf2*-deficient and *Keap1*-deficient BMDMs are normal in appearance, cell numbers and macrophage marker F4/80 expression. (a) Images of BMDMs obtained from wild-type (WT), KpCKO and Nrf2-KO mice. Scale bars represent 100  $\mu$ m. (b) Flow cytometric analysis to confirm the expression of macrophage marker F4/80. Note that BMDMs from all genotypes of mice are almost 100% positive for F4/80. Fluorescein isothiocyanate- or phycoerythrin-conjugated F4/80-specific monoclonal antibodies were purchased from eBioscience. Flow cytometry analysis was performed using FACS-Caliber (BD Biosciences) and FlowJo software (TOMY Digital Biology). (c) The numbers of BMDMs obtained from  $5 \times 10^5$  bone marrow cells of mice with each genotype. BMDMs were non-enzymatically

dissociated from dishes and counted with Countess (Thermo). Almost all of these BMDMs are F4/80-positive as shown in **(b)**. **(d)** The numbers of neutrophils obtained from unilateral femur of mice with each genotype. Bone marrow mononuclear cells obtained with Histopaque (Sigma-Aldrich) were counted and used for flow cytometry analysis. The number of neutrophil was calculated from the total cell count and the percentage of CD11b<sup>+</sup>Ly6G<sup>+</sup> cells. Representative data **(a, b)** or mean±s.d. **(c)** from at least four mice for macrophage count and mean±s.d. from 3-4 mice **(d)** for neutrophil count are shown (ns, not significant by unpaired *t*-test).

## Supplementary Fig. 2

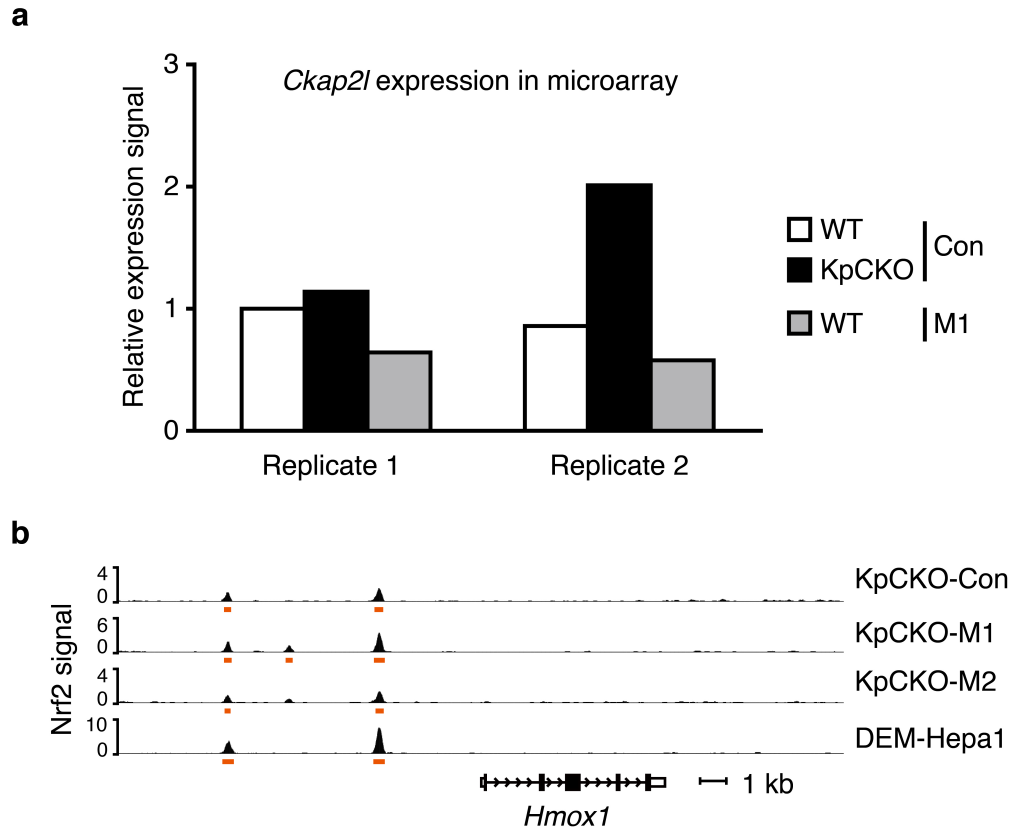

**Supplementary Fig. 2** Microarray and ChIP-seq analyses of *Keap1*-deficient BMDMs. **(a)** Relative expression signal of *Ckap2l* gene in microarray analysis. Wild-type (WT) and *Keap1*-deficient BMDMs (KpCKO) were untreated (Con) or treated with M1 stimulation (M1, 5-ng ml<sup>-1</sup> LPS and 10-ng ml<sup>-1</sup> IFN $\gamma$ ) for 6 hours. **(b)** Nrf2 ChIP-seq track of known Nrf2 target gene *Hmox1*. *Keap1*-deficient BMDMs were untreated (KpCKO-Con) or treated with M1 stimulation (KpCKO-M1, 5-ng ml<sup>-1</sup> LPS and 10-ng ml<sup>-1</sup> IFN $\gamma$ ) or M2 stimulation (KpCKO-M2, 10-ng ml<sup>-1</sup> IL-4) for 4 hours. ChIP-seq data of DEM-treated Hepa1 cells were reported elsewhere and re-analysed<sup>1</sup>. Orange bars under the tracks represent the peak regions detected by the MACS2 peakcaller.

### Supplementary Fig. 3

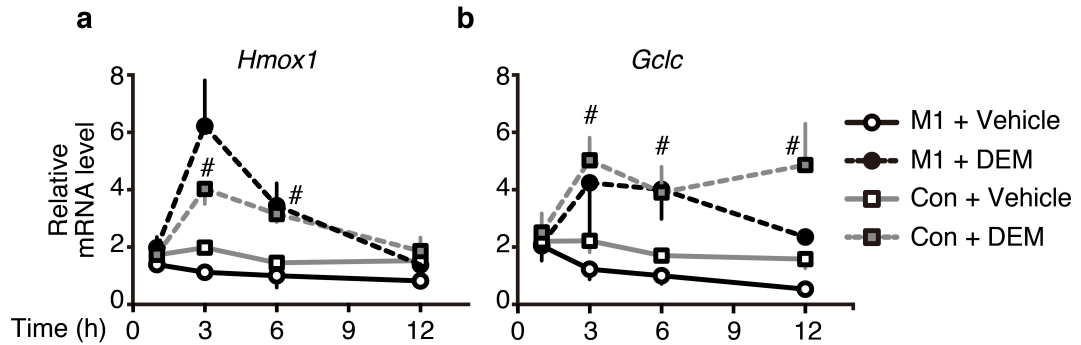

**Supplementary Fig. 3** Time-course expression of known Nrf2 target genes. **(a-b)** Relative mRNA expression of antioxidative Nrf2 target genes, *Hmox1* **(a)** and *Gclc* **(b)**, at indicated times from the start of M1 stimulation (M1, 5-ng ml<sup>-1</sup> LPS and 10-ng ml<sup>-1</sup> IFN $\gamma$ ) in the presence of 100- $\mu$ M DEM or vehicle. DEM and vehicle were added in the culture media at the same time as M1 stimulation. The value of M1+Vehicle at 6 hours is set to 1. \* $P$ <0.05 (unpaired  $t$ -test) against M1+Vehicle, # $P$ <0.05 (unpaired  $t$ -test) against Con+Vehicle. Data are mean $\pm$ s.d. from three mice.

## Supplementary Fig. 4

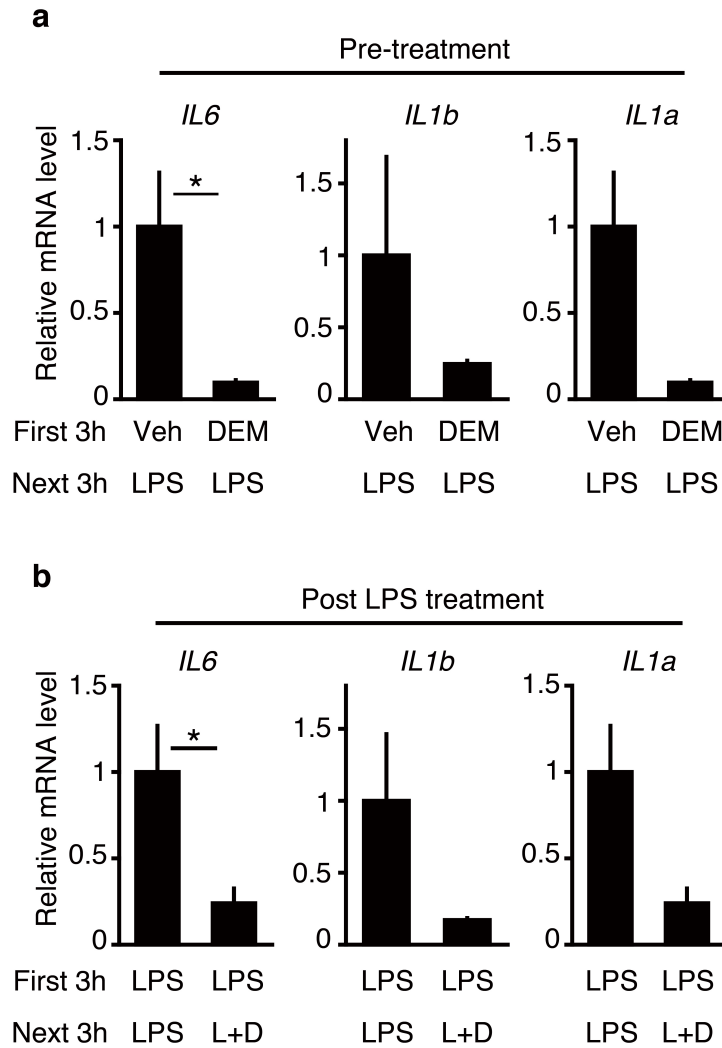

**Supplementary Fig. 4** Nrf2 inhibits expression of proinflammatory cytokine genes regardless of the order of Nrf2 activation and LPS treatment. **(a)** Relative mRNA expression of the *IL6*, *IL1b* and *IL1a* genes in the wild-type BMDMs pretreated with 100- $\mu$ M DEM (DEM) or vehicle (Veh) for 3 hours before 3 hours of 5-ng ml<sup>-1</sup> LPS treatment. **(b)** Relative mRNA expression of the *IL6*, *IL1b* and *IL1a* genes in the wild-type BMDMs treated with DEM or vehicle in combination with LPS for 3 hours after 3 hours of LPS treatment. L+D, LPS+DEM. Data are mean $\pm$ s.d. from three mice (\* $P$ <0.05, unpaired  $t$ -test). This repression was reproducible in BMDMs obtained from multiple mice.

## Supplementary Fig. 5

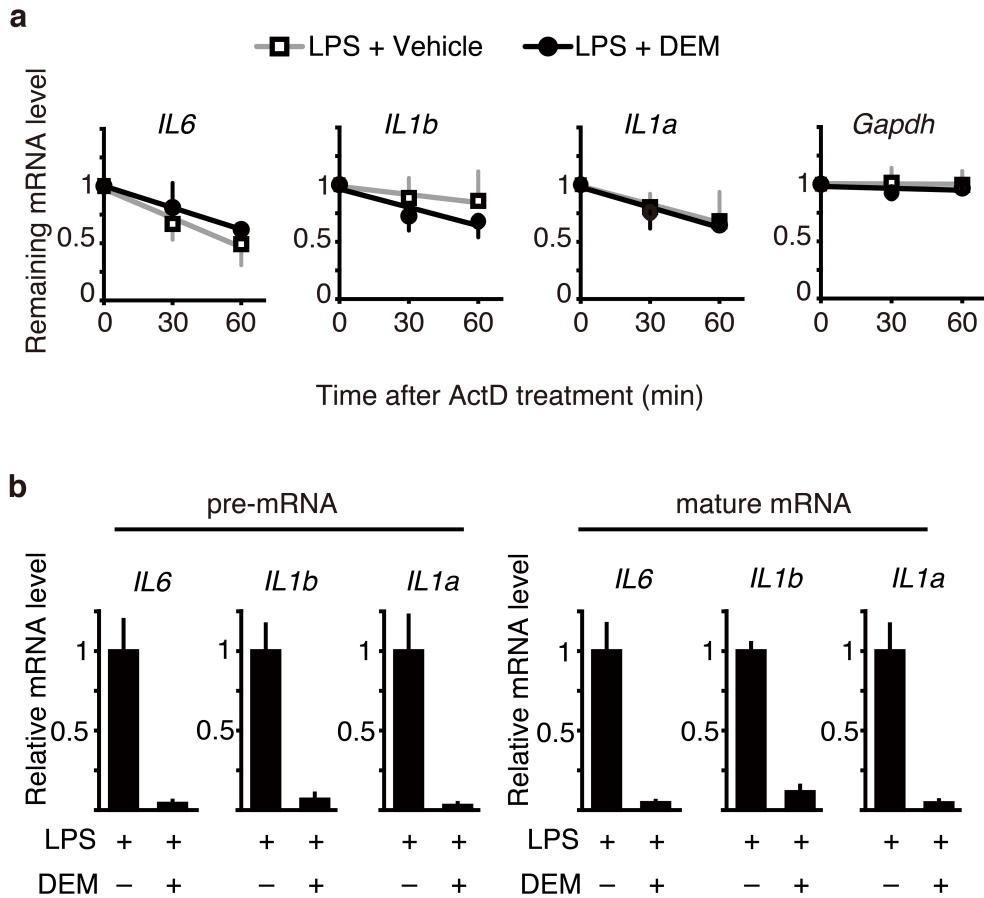

**Supplementary Fig. 5** Nrf2 inhibits the expression of proinflammatory cytokines at the transcriptional level. **(a)** Stability of mRNA was not changed by the chemical Nrf2 inducer. Wild-type BMDMs were LPS-stimulated ( $5\text{-ng ml}^{-1}$ ) for 3 hours in the presence of  $100\text{-}\mu\text{M}$  DEM before the treatment with actinomycin D (ActD). The stability of mRNA is evaluated by the remaining mRNA after ActD treatment. Data are normalized by the mRNA level of each sample at 0 min. The remaining mRNA level of *Gapdh* is used as a control of stable mRNA. **(b)** Reduction in pre-mRNA of proinflammatory cytokine genes by the chemical Nrf2 inducer. Wild-type BMDMs were LPS-stimulated in the presence of  $100\text{-}\mu\text{M}$  DEM or vehicle for 6 hours. Pre-mRNA expression was detected by RT-qPCR using the primers specific to the introns of *IL6*, *IL1b* and *IL1a* genes. Data are mean $\pm$ s.d. from three mice ( $*P<0.05$ , unpaired *t*-test).

## Supplementary Fig. 6

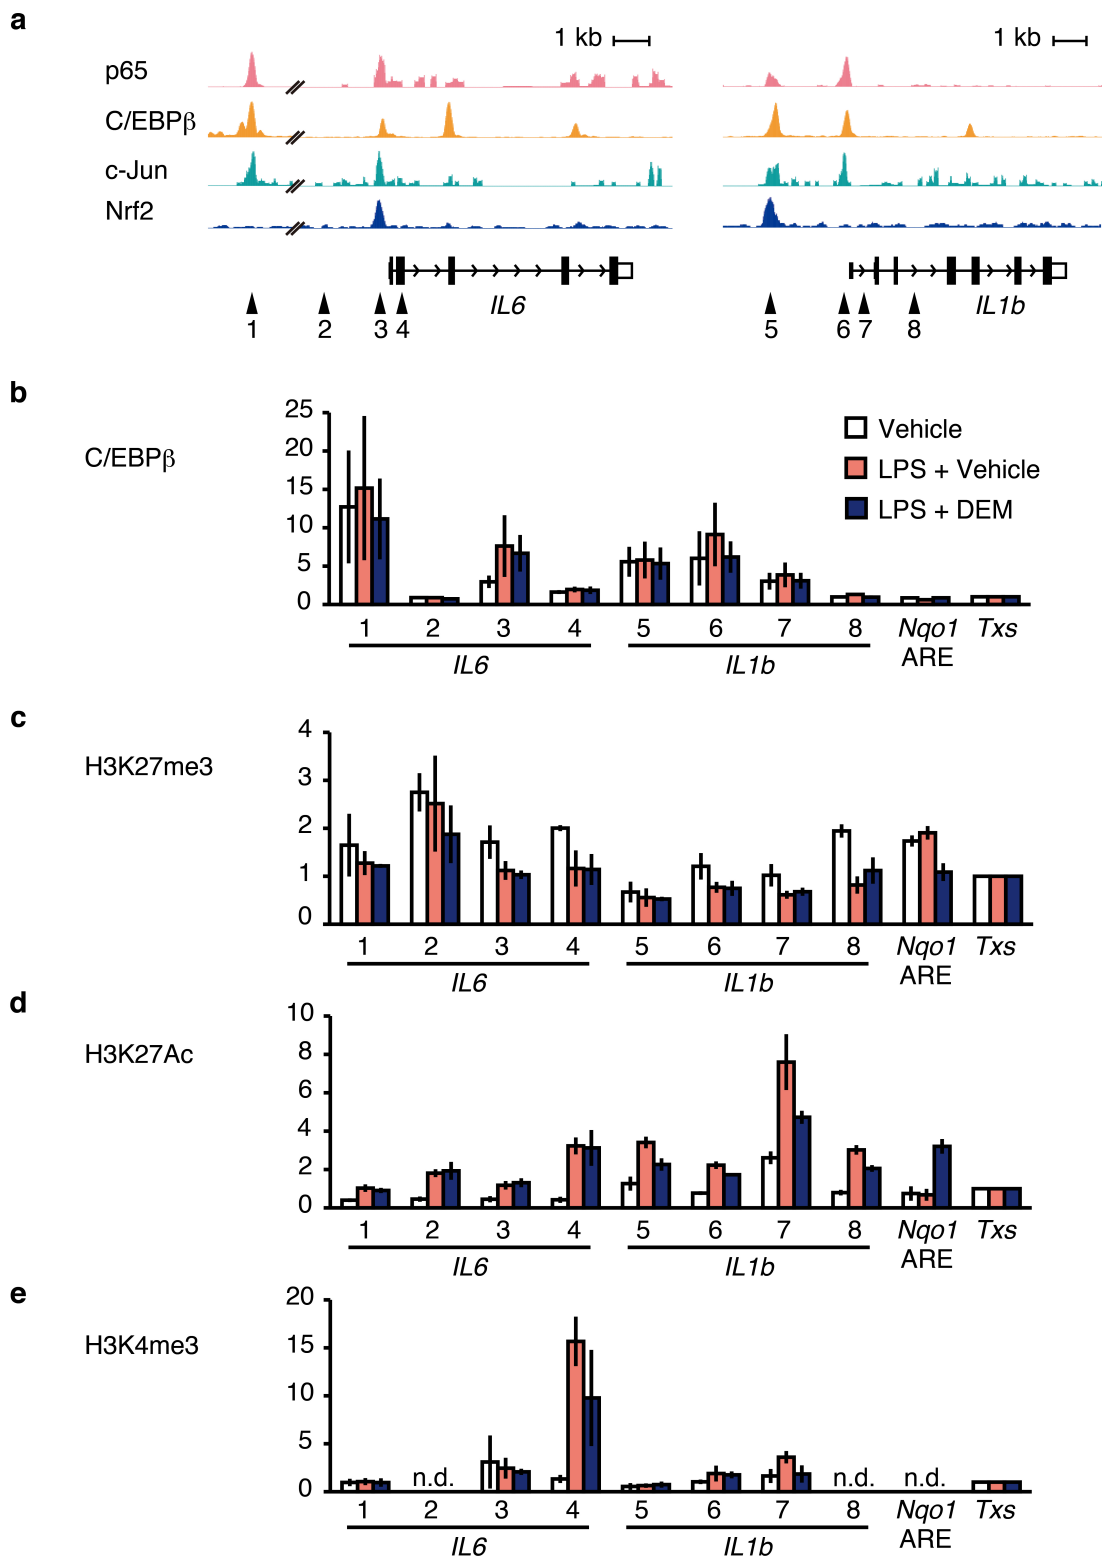

**Supplementary Fig. 6** Nrf2 activation exerts negligible effect on the histone modifications and recruitment of C/EBP $\beta$  at the *IL6* and *IL1b* loci. **(a)** ChIP-sequencing track specific for p65<sup>2</sup>, C/EBP $\beta$ <sup>3</sup> and c-Jun<sup>4</sup> at the *IL6* and *IL1b* loci. Nrf2 ChIP-sequencing track of KpCKO-M1 BMDMs is depicted as in **Fig. 2**. **(b-e)** ChIP-qPCR for C/EBP $\beta$  **(b)**, H3K27me3 **(c)**, H3K27Ac **(d)**, and H3K4me3 **(e)**. Wild-type BMDMs were stimulated with 5-ng ml<sup>-1</sup> LPS, in the presence of 100- $\mu$ M DEM or vehicle, for 4 hours. Primers for the ChIP-qPCR were designed to amplify the regions indicated with triangles in **(a)**. The *Txs* intron and the Nrf2-binding site near *Nqo1* gene (*Nqo1* ARE) were used as negative controls. The 60-kb upstream site of the *IL6* gene is used as a positive control for C/EBP $\beta$  binding. Data are shown as relative enrichment, and the signal at the *Txs* intron is set to 1. n.d., not determined.



## Supplementary Fig. 7

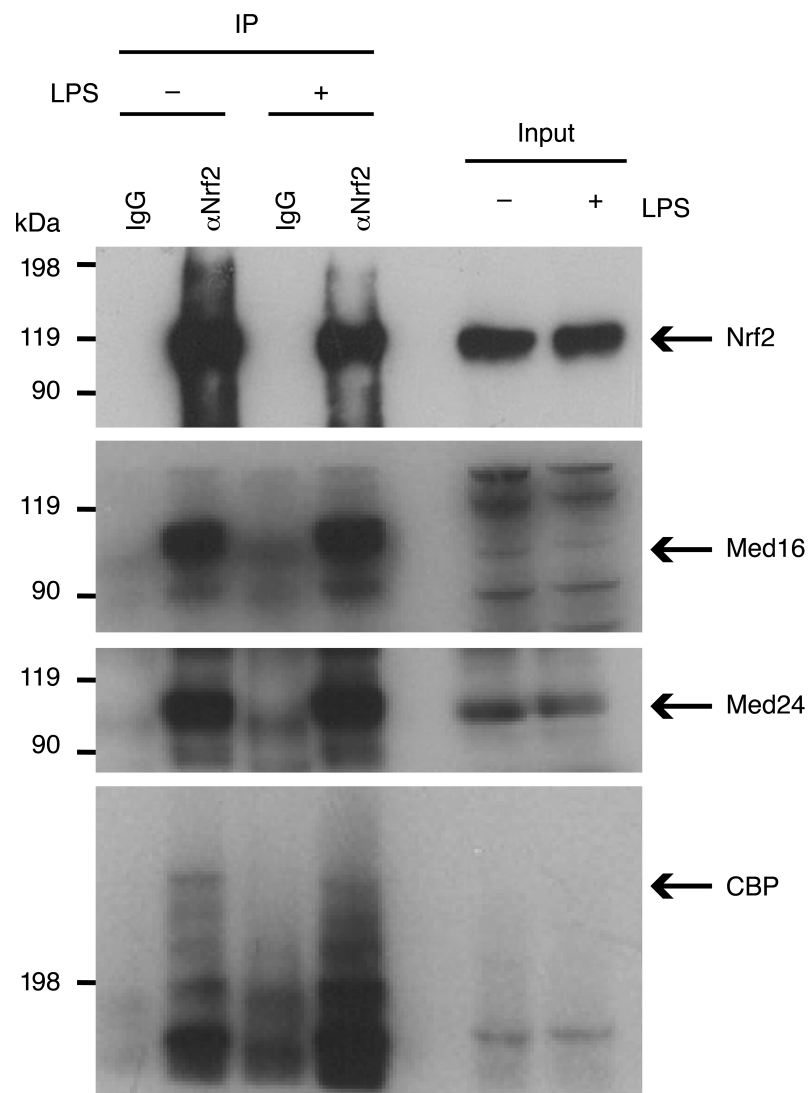

**Supplementary Fig. 7** Co-activator CBP and components of Mediator complex, MED16 and MED24, reside in immunoprecipitated endogenous NRF2 complex in Raw264.7 cells in the presence of DEM. CBP<sup>5</sup> and the component of Mediator complex<sup>6</sup>, MED16 and MED24, have been shown to associate with Nrf2 and act as transcriptional co-activators. We immunoprecipitated endogenous NRF2 complex in Raw264.7 cells treated with 100- $\mu$ M DEM and with or without 20-ng ml<sup>-1</sup> LPS for 4 hours. Note that MED16/24 and CBP in the Nrf2 complex are rather increased upon treatment with LPS.

## Supplementary Fig. 8

**a**

*IL6* upstream region

GTGTGTGTGTGTGTGTGTGTGTGTGTATGTGTGTGTCGTCTGTCATGCGCGGTGCCTGCGTTTA

AATAACATCAGCTTTAGCTTCTCTTTCTCCTTATAAAACATTGTGAATTCAGTTTTCTTTCCCA

.....

TCAAGACATGCTCAAGTGCTGAGTCACTTTTAAAGAAAAAAGAAGAGTGCTCATGCTTCTTAG

.....

GGCTAGCCTCAAGGATGACTTAAGCACACTTCCCCTCCTAGTTGTGATTCTTCGATGCTAAA

.....

CGACGTCACATTGTGCAATCTTAATAAGTTTCCAATCAGCCCCACCACTCTGGCCCCACCCC

—— Deleted region in clone #1    Nrf2 binding region  
 ..... Deleted region in clone #2    PAM sequence  
                                          Conserved ARE

**b**

*IL1b* upstream region

TGTTCTATCAAACCTCATCCTGGCCCTGTGACTTGGGCTCCAAATTCCTCCCTTGTCGTTATA

GAGCAGGCAAGTTGCACAACATGTATATCAAACCTGTCTCTCAGACCACACTTCCTTTTTGGTC

.....

CCCAATGAGTAGAAGAAATAACTCACTATAGAAATTGTTATGCTGGGGTGTGGCATAGTATGA

.....

CGATACTGATGATGATGTTGGCAAAGGAAATGAACAAAGCAAAGAGGAAGTCGGCAAAGCCAGG

.....

ATGGTGACGGGCACTCTAGCTTTTGGGAACTTTTCAGCTCTTGACTCACTCAGCACTTTTAAGC

.....

TGTAAGGTTCCCTCTGTTCTGACATCTCATTCTCCAAGATGGAGGCAGGCATTTCTTCAAAGCT

.....

GAAAGTGCCTTGCTACCTGTTTTACTTACTTTCTATTGCTGTGATAACCATGACTACTGTGCAGC

.....

CCAGACTGGCTTCAAGTACATGACAATTCTCCTGCATTTGTCTCCAAGGACTGAGATTACAGGC

.....

ACGAGCTCCCAGGCCAGTTGATGTATGTGTTCTACATCTTCTTTACTTATCCTCTTGCTCAGAA

.....

^  
G

—— Deleted region in clone #1 and #2    Nrf2 binding region  
                                          PAM sequence  
                                          ARE-like sequence

**Supplementary Fig. 8** Deletions of regulatory sequences of *IL6* and *IL1b* genes harboring AREs from Raw264.7 cells. Regulatory sequences harboring AREs of the *IL6* (**a**) and *IL1b* (**b**) genes were deleted by means of genome-editing technology. Lines under the sequences show the deleted region. The regulatory regions determined in KpCKO-M1 BMDMs are depicted with blue characters, while PAM sequences used for deletion are depicted with magenta. In the cells lack the *IL6* gene regulatory region (**a**), upper line shows deleted region from clone 1, while lower dashed line shows deleted region in clone 2. Green characters show the conserved ARE, TGAG/CnnnGC. In the cells lack the *IL1b* regulatory region (**b**), both upper and lower lines show deleted regions in clones 1 and 2. Yellow characters show the ARE-candidate sequences.

## Supplementary Fig. 9

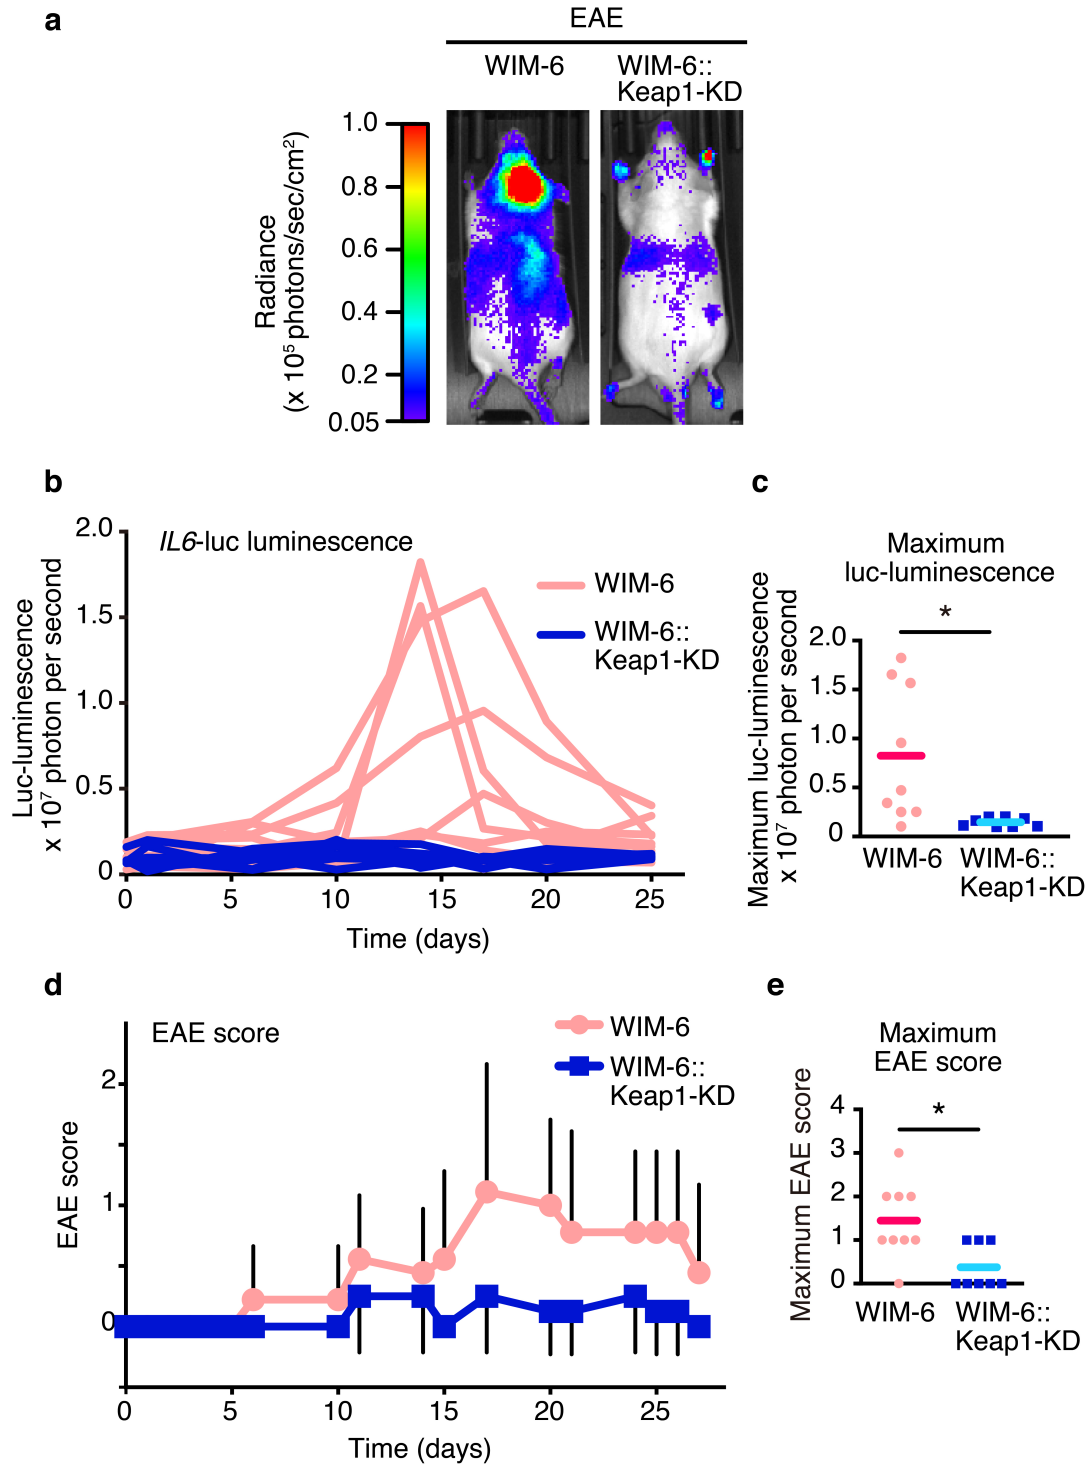

**Supplementary Fig. 9** Nrf2 inhibits *IL6* expression and inflammatory phenotypes in EAE model with the ICR background. **(a-e)** *In vivo* monitoring of *IL6* expression in the EAE model. WIM-6 mice with wild-type *Keap1* (WIM-6, n=9) or *Keap1*-knockdown background (WIM-6::Keap1-KD, n=8) on the ICR background were subjected to EAE induction. Representative images of *IL6*-luc luminescence at day 17 **(a)** and the *IL6*-luc luminescence intensity in each mouse **(b)**, and the maximum *IL6*-luc luminescence in the observation period are shown **(c)**. Red and blue lines represent the mean of the maximum luminescence intensity. \* $P < 0.05$ , unpaired *t*-test. **(d, e)** Clinical EAE scores in the same experiment as **a-c**. The mean $\pm$ s.d. of EAE score **(d)** and the maximum EAE score in the observation period **(e)** are shown. Red and blue lines represent the mean of the maximum EAE score. \* $P < 0.05$ , unpaired *t*-test.

## Supplementary Fig. 10

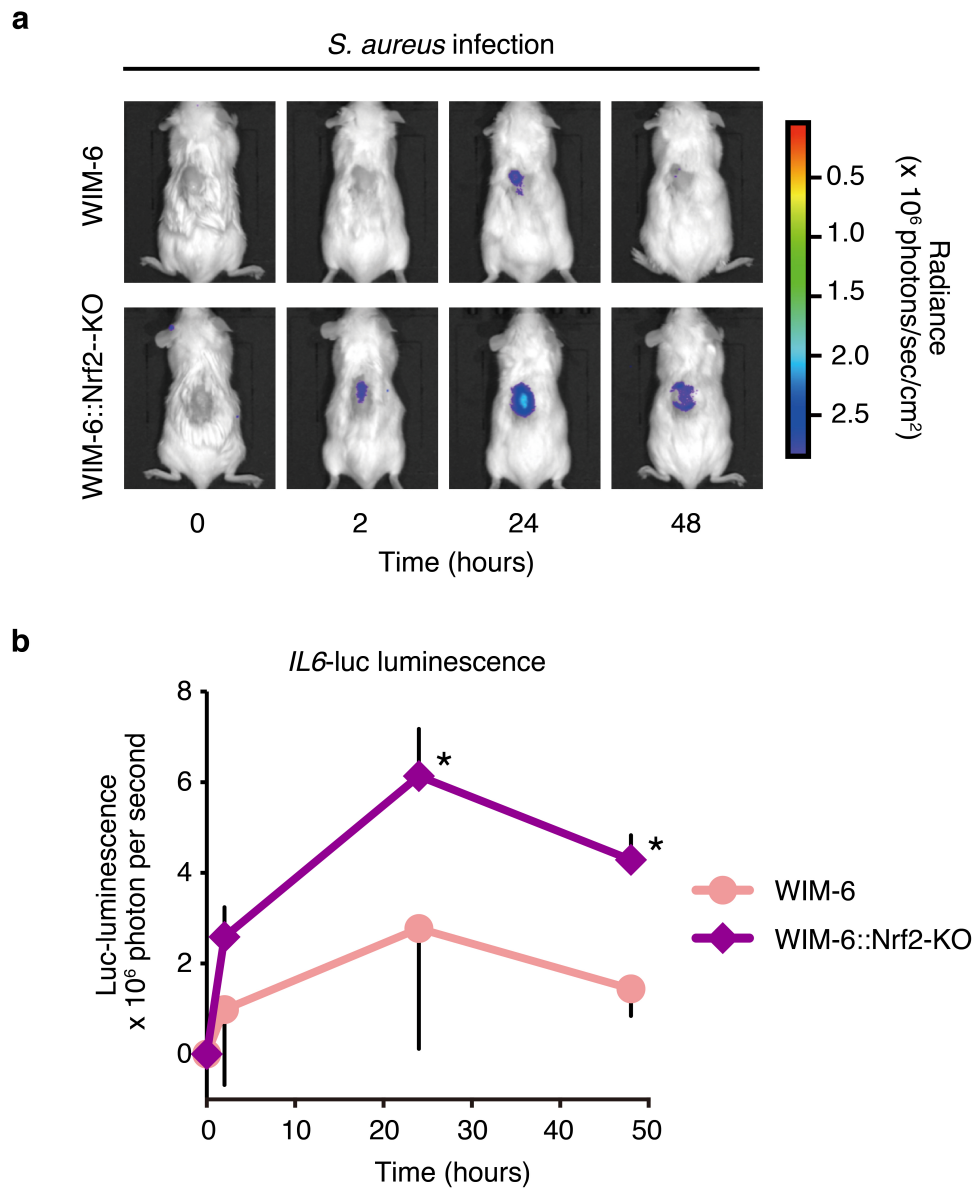

**Supplementary Fig. 10** Nrf2 knockout mice show enhanced *IL6* expression *in vivo*. *In vivo* monitoring of *IL6* expression was conducted exploiting a *S. aureus* infection model. WIM-6 mice with wild-type *Nrf2* (WIM-6, n=5) or *Nrf2*-knockout background (WIM-6::Nrf2-KO, n=4) on the ICR background were infected with *S. aureus*. Representative *in vivo* bioluminescence (**a**) and time-course of luminescence intensity (**b**) are shown. Note that the Nrf2 knockout mice show markedly enhanced inflammation, as can be seen in terms of luminescence mimicking the *IL6* gene expression. \* $P < 0.05$ , unpaired *t*-test.

# Supplementary Fig. 11

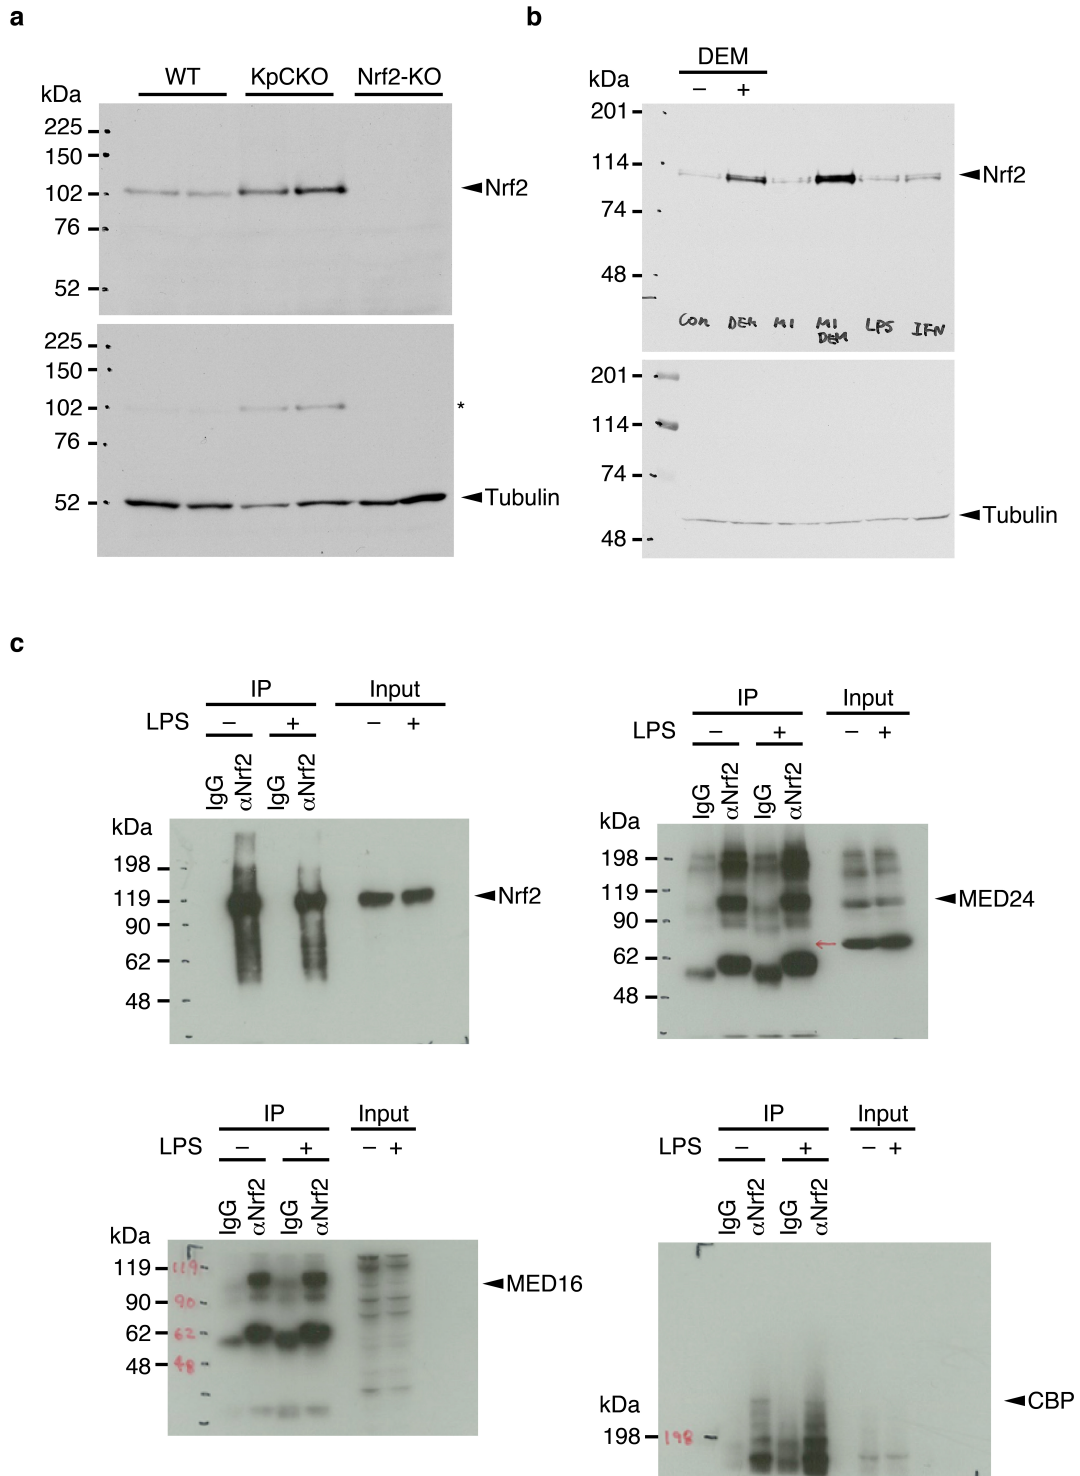

**Supplementary Fig. 11** Full-size images of Western blots. **(a)** Uncropped scan of Western blot shown in Fig. 1a. Nrf2 protein expression in BMDMs from two independent wild-type (WT), KpCKO, and Nrf2KO mice, respectively. The left 4 lanes were cropped for Fig. 1a. After first immunoblotting to detect Nrf2, the membrane was incubated with antibody specific for  $\alpha$ -Tubulin to confirm equal loading. \*Remaining signal of Nrf2 protein. **(b)** Uncropped scan of Western blot shown in Fig. 4a. Nrf2 protein accumulation in the WT BMDMs treated with 100- $\mu$ M DEM or vehicle for 4 hours. The left 2 lanes were cropped for Fig. 4a. After first immunoblotting to detect Nrf2, the membrane was stripped and incubated with antibody specific for  $\alpha$ -Tubulin to confirm equal loading. **(c)** Uncropped scans of Western blots in Supplementary Fig. 7. Endogenous NRF2 complex was immunoprecipitated from DEM-treated Raw264.7 cells treated with or without LPS.



## References

1. Hirotsu, Y. *et al.* Nrf2-MafG heterodimers contribute globally to antioxidant and metabolic networks. *Nucleic Acids Res.* **40**, 10228–39 (2012).
2. Barish, G. D. *et al.* Bcl-6 and NF-kappaB cistromes mediate opposing regulation of the innate immune response. *Genes Dev.* **24**, 2760–5 (2010).
3. Roe, J.-S., Mercan, F., Rivera, K., Pappin, D. J. & Vakoc, C. R. BET Bromodomain Inhibition Suppresses the Function of Hematopoietic Transcription Factors in Acute Myeloid Leukemia. *Mol. Cell* **58**, 1028–39 (2015).
4. Uhlenhaut, N. H. *et al.* Insights into negative regulation by the glucocorticoid receptor from genome-wide profiling of inflammatory cistromes. *Mol. Cell* **49**, 158–71 (2013).
5. Katoh, Y. *et al.* Two domains of Nrf2 cooperatively bind CBP, a CREB binding protein, and synergistically activate transcription. *Genes to Cells* **6**, 857–868 (2001).
6. Sekine, H. *et al.* The Mediator Subunit MED16 Transduces NRF2-activating Signals into Antioxidant Gene Expression. *Mol. Cell. Biol.* (2015).  
doi:10.1128/MCB.00785-15
