# Supplementary material for: Nrf2 suppresses macrophage inflammatory response by blocking proinflammatory cytokine transcription
Source: PubMed Central journal article supplement (PMC4879264; doi:10.1038/ncomms11624), 2016-05-23
Supplement: ncomms11624-s2.pdf [file ncomms11624-s2.pdf]

**Editorial Note:** this manuscript has been previously reviewed at another journal that is not operating a transparent peer review scheme. It was accepted without further rounds of review at Nature Communications.
